## **Non-steroidal anti-inflammatories for analgesia in critically ill patients: a systematic review and meta-analysis of randomized control trials**

Chen-Hsiang Ma, BSc<sup>1</sup>

Kimberly B. Tworek, BScN<sup>1</sup>

Janice Y. Kung, MLIS<sup>2</sup>

Sebastian Kilcommons, BSc<sup>1</sup>

Kathleen Wheeler, MD<sup>3</sup>

Arabesque Parker, MD, MSc<sup>4</sup>

Janek Senaratne, MD, MSc<sup>4</sup>

Erika Macintyre, MD<sup>4</sup>

Wendy Sligl, MD, MSc<sup>4</sup>

Constantine J. Karvellas, MD, MSc<sup>4</sup>

Fernando G Zampieri, MD, PhD<sup>4</sup>

Demetrios Jim Kutsogiannis, MD, MSc<sup>4</sup>

John Basmaji, MD<sup>5</sup>

Kimberley Lewis, MD, MSc<sup>6,7</sup>

Dipayan Chaudhuri, MD, MSc<sup>6,7</sup>

Sameer Sharif, MD<sup>7</sup>

Oleksa G. Rewa, MD, MSc<sup>4,8</sup>

Bram Rochweg, MD, MSc<sup>6,7</sup>

Sean M. Bagshaw, MD, MSc<sup>4,8,9</sup>

Vincent I. Lau, MD, MSc<sup>4</sup>

1. Faculty of Medicine and Dentistry, University of Alberta, and Alberta Health Services, Edmonton, Alberta, Canada.
2. John W. Scott Health Sciences Library, University of Alberta, Edmonton, Alberta, Canada.
3. Department of Anesthesia, McMaster University, Hamilton, Ontario, Canada.
4. Department of Critical Care Medicine, Faculty of Medicine and Dentistry, University of Alberta, and Alberta Health Services, Edmonton, Alberta, Canada.
5. Department of Medicine, Division of Critical Care, Western University, London, Ontario, Canada.
6. Department of Health Research Methods, Evidence & Impact, McMaster University, Hamilton, Ontario, Canada.
7. Department of Medicine, Division of Critical Care, McMaster University, Hamilton, Ontario, Canada.
8. School of Public Health, University of Alberta, Edmonton, Alberta, Canada.
9. Critical Care Strategic Clinical Network, Alberta Health Services, Edmonton, Alberta, Canada

Corresponding Author: Vincent Lau\*, Department of Critical Care Medicine, Faculty of Medicine and Dentistry, University of Alberta and Alberta Health Services, 8440 112 Street, Edmonton, Alberta, Canada; vince.lau@ualberta.ca

Key Words: NSAID; pain; Intensive care unit; opiates; meta-analysis

### **Statements and Declarations**

**Competing Interests/Funding Statement:** None of the authors disclose any competing interests. There was no funding for this research. Dr. Bagshaw is supported by a Canada Research Chair in Critical Care Outcomes and Systems Evaluation.

**Patient and public statement:** Patients or the public were not involved in the design, conduct, reporting, or dissemination plans of our research.

### **Contributions**

Conceptualization: CHM, KT, SB, OR, VL.

Data Extraction: CHM, KT, VL;

Formal analysis: All authors;

Writing – original draft: CHM, VL; Writing – reviewing and editing: all authors

### **Acknowledgements**

The authors would like to thank Alla Iansavitchene, London Health Sciences Centre, Health Sciences Library, for peer reviewing the MEDLINE search strategy.

### **Funding Statement**

No funding sources to declare.

Manuscript Word Count: 3162, Abstract Word Count: 249, Figures: 2, Tables: 2

## Abstract

**Purpose:** While opioids are part of usual care for analgesia in the intensive care unit (ICU), there are concerns regarding excess use. This is a systematic review of non-steroidal anti-inflammatories (NSAIDs) use in critically ill adult patients.

**Methods:** We conducted a systematic search of MEDLINE, EMBASE, CINAHL, and Cochrane Library. We included randomized control trials (RCTs) comparing NSAIDs alone or as an adjunct to opioids for analgesia. The primary outcome was opioid utilization. We reported mean difference for continuous outcomes and relative risk for dichotomous outcomes with 95% confidence intervals (CIs). We evaluated study risk of bias using the Cochrane risk of bias tool and evidence certainty using GRADE.

**Results:** We included 15 RCTs (n=1621 patients). Adjunctive NSAID therapy to opioids reduced 24-hour oral morphine equivalent consumption by 21.4mg (95% CI: 11.8-31.0mg reduction, high certainty) and probably reduced pain scores (measured by visual analogue scale) by -6.1mm (95% CI: -12.2 to +0.1, moderate certainty). Adjunctive NSAIDs probably had no impact on duration of mechanical ventilation (-1.6 hours, 95% CI: -0.4 to -2.7 hours, moderate certainty) and may have no impact on ICU length of stay (-2.1 hours, 95% CI: -6.1 to +2.0 hours, low certainty). Variability in reporting of adverse outcomes (e.g. gastrointestinal bleeding, acute kidney injury) precluded their meta-analysis.

**Conclusion:** In critically ill adult patients, NSAIDs reduced opioid use, probably reduced pain scores, but were uncertain for duration of mechanical ventilation or ICU length of stay. Further research is required to characterize the prevalence of NSAID-related adverse outcomes.

**Keywords:** NSAID, ketorolac, intensive care unit, opioid, meta-analysis

## Take-Home Message

In this systematic review and meta-analysis of 15 randomized control trials that included 1621 critically ill adult patients, the addition of non-steroidal anti-inflammatories to an opioid analgesic

strategy reduced 24-hour opioid use and modestly reduced pain with no impact on duration of mechanical ventilation or ICU length of stay.

## Introduction

Opioids are liberally administered in intensive care units (ICU) as part of analgesic and sedation regimens [1]. However, the prolonged opioid exposure can lead to patients developing tolerance, physical dependence, and withdrawal if abruptly discontinued [2]. These effects may carry over even after discharge from the hospital. A retrospective study of opiate-naïve ICU patients in Canada found that 20% of patients were prescribed opioids following hospital discharge, and 4% continued to use opioids after 12 months [3, 4]. In the United States, 4.1% of patients admitted to the ICU post-operatively developed new persistent opioid use [5]. Excess opioid prescription at discharge from hospital increases the risk of opioids available for inappropriate use. Even in places where opioid crisis is less pronounced (Europe and South America), concerns remain regarding the role of opioids in delirium, respiratory depression, and ileus [2, 6–9]. Thus, a clear need for alternative adjunctive analgesics (using a multi-modal approach) to reduce opioid use in the ICU for pain control is required [1].

Non-steroidal anti-inflammatory drugs (NSAIDs) are one the most well-known and prescribed over-the-counter medication classes and are effective anti-inflammatory, anti-pyretic, and analgesic agents [10]. NSAIDs such as ketorolac have been used extensively in emergency medicine and for post-operative analgesia [11–14]. NSAIDs function by inhibiting cyclooxygenase enzymes, which prevents the synthesis of prostaglandin, thromboxane, and prostacyclin [15]. Unfortunately, prostaglandin is also implicated in protecting gastric mucosa and renal hemodynamics, contributing to adverse effects of NSAID use [16]. These adverse events are well documented in the literature, but their prevalence in the ICU setting remains unclear.

The Society of Critical Care Medicine (SCCM) guidelines for the Prevention and Management of Pain, Agitation/Sedation, Delirium, Immobility, and Sleep Disruption (PADIS) from 2018 stated a weak recommendation against the use of NSAIDs in the critical care setting, citing only minor reduction in opioid use and risks of potential adverse outcomes such as kidney injury and gastrointestinal bleeding [1]. Systematic reviews published since then have suggested

that the opioid-sparing effect of NSAIDs may be understated while incidence of adverse outcomes remain uncertain [17]. However, concerns remain surrounding the small number of studies analyzed as well as the inconsistent inclusion of trials in pooled analysis across the PADIS guideline and recent reviews [1, 17, 18]. Furthermore, there is evidence that lower dose NSAIDs may be beneficial for specific patient populations (e.g., emergency department, post-surgical patients: orthopedic, spinal, cardiac, abdominal, obstetrical) [13, 14, 19–24]. However, the evidence for opioid-sparing and analgesic effects of NSAIDs in critically ill populations remains uncertain.

To address this, we conducted a comprehensive and updated systematic review and meta-analysis of the available evidence on NSAID use in the critically ill adult population.

## **Methods**

This review followed the Preferred Reporting Items for Systematic reviews and Meta-Analyses (PRISMA) guidelines and was registered with the International Prospective Register of Systematic Reviews (PROSPERO: CRD42022332635) on May 26, 2022 [25]. The completed PRISMA checklist is included in Supplementary Table 1.

## **Search Strategy**

We developed the search strategy with the assistance of a medical librarian (JYK) and the strategy underwent peer review before search translation [26]. We conducted a systematic search in Ovid Medical Literature Analysis and Retrieval System Online (MEDLINE), Ovid Excerpta Medica database (EMBASE), Cumulative Index to Nursing and Allied Health Literature (CINAHL), and Cochrane Library (via Wiley) on May 29, 2022. In addition, we also searched trial registries (e.g., ClinicalTrials.gov), Google Scholar, and bibliographies from included studies as well as relevant systematic and narrative reviews. The search did not restrict results based on publication type or language. Search strategies for each database are listed in in Supplementary Table 2.

## Study Selection

Study selection was made independently and in duplicate by two investigators (CHM, KT) using Covidence systematic review software (Veritas Health Innovations, Melbourne, Australia). Titles and abstracts were screened for study design, population, and intervention. Any study that was identified as potentially eligible at this first stage was advanced to full-text review for assessment of eligibility. We resolved disagreements using a third party (VL), if needed. We recorded reasons for exclusion at the full-text review stage only.

We included randomized control trials (RCTs) that compared NSAIDs as adjunctive systemic analgesia to opioids alone in the adult critical care setting. Critical care patients included all medical, surgical, and trauma patients admitted to the intensive care unit. The intervention group consisted of NSAIDs alone or as an adjunct to opioids. Opioid dosing could be either scheduled, through patient-controlled analgesia (PCA), or administered as needed (PRN). We excluded observational cohort studies, retrospective analyses, and non-peer-reviewed research. We also excluded studies that looked at pre- or perioperative interventions or lacked opioid-only control/placebo groups.

The primary outcome was opioid utilization, which we standardized to oral morphine equivalent (OME) using published guidelines [27]. We included the following secondary outcomes: differences in pain scores, duration of mechanical ventilation, ICU and hospital length of stay, delirium, and mortality (ICU and hospital). If multiple time points were reported for opioid utilization and pain scores, we meta-analyzed the time point with the most data available. We also included safety outcomes such as incidence of adverse events (e.g., bleeding, renal dysfunction, constipation), and longer-term psychological effects (e.g., chronic pain, post-traumatic stress disorder) defined by individual study authors.



## Data Extraction

We completed data extraction independently and in duplicate by two investigators (CHM, KT) using pre-defined abstraction forms. A third reviewer resolved any discrepancies (VL). We recorded study characteristics, patient demographics, intervention details and outcomes of interest. We requested data from authors of studies with missing results, if applicable. We also extrapolated outcomes that were only presented graphically using a web plot digitizer [28].

## Risk of Bias and GRADE Assessment

We assessed risk of bias using the modified Cochrane Collaboration risk of bias tool in the following domains: sequence generation, allocation concealment, participant/investigator blinding, selective reporting, outcome blinding, addressing incomplete data, and other biases [29]. Each domain was assigned a low, probably low, probably high, or high risk of bias. We determined the overall risk of bias by taking the highest risk score in any individual domain. We assessed the overall certainty of the evidence using the Grading of Recommendations, Assessment, Development, and Evaluation (GRADE) framework [30]. We used the narrative summaries as endorsed by GRADE (moderate certainty is *probably*, low certainty is *may*, and very low certainty is *uncertain*) to describe the effect size and certainty of evidence [31]. Disagreements within the ROB and GRADE assessment was resolved by discussion and consensus.

## Data Analysis

We conducted meta-analysis using Review Manager (RevMan) software (The Cochrane Collaboration, version 5.4., Copenhagen, Denmark) using the DerSimonian and Laird random effects model to pool effect sizes for all outcomes of interest [32]. We calculated the relative risk ratio for dichotomous outcomes and the mean difference for continuous outcomes, with corresponding 95% confidence intervals. When necessary, we converted medians to mean and standard deviation using methods suggested by the Cochrane Collaboration [33].

We assessed heterogeneity using the  $I^2$  statistic, the  $X^2$  test for homogeneity, and visual inspection of the forest plots. We considered directionality, the  $I^2$  value, where >50% may suggest substantial heterogeneity, and perceived heterogeneity in deciding when to downgrade the certainty of the evidence for inconsistency [34]. Although we had planned to produce funnel plots and perform Egger's weighted regression plot analysis to assess for small study effects, none of the included outcomes had sufficient included trials (at least 10 studies) to allow for this analysis.

### **Subgroup analyses**

Several *a priori* subgroup analyses were considered (with hypothesized direct of effect) [35]:

- (1) Ketorolac versus other NSAIDs (ketorolac use would result in greater opioid reduction compared to other NSAIDs);
- (2) Younger (age < 55) versus elderly (age  $\geq$  55) (NSAID-related adverse outcomes would be less in the younger patient population);
- (3) Higher Acute Physiology and Chronic Health Evaluation (APACHE) scores ( $\geq$ 25) versus lower APACHE scores (<25) (NSAIDs would be more beneficial in patients with lower APACHE scores).
- (4) High versus low risk of bias studies (high risk of biases would favour NSAID use)

## **Results**

### **Search results and study characteristics**

We identified 2764 citations, reviewed 73 full-text manuscripts, and included 15 randomized controlled trials in the meta-analysis [23, 36–49] (Fig 1). Table 1 provides further details on the demographics and baseline characteristics of included trials. The meta-analysis included 1621 patients with an overall mean age of  $58 \pm 11.3$  years, 23% of which were female. The indication for ICU admission in all trials was post-operative monitoring for elective surgeries.

Cardiac surgeries accounted for 12 studies, 11 of which were post-coronary artery bypass grafts. Other studies included post-spinal fusion surgery [38], gastrectomy [39], major abdominal surgery [23], and hepatectomy [48]. NSAIDs used in the trials included non-selective (diclofenac, ketoprofen, ketorolac, indomethacin) and COX-2 selective (parecoxib, valdecoxib, etodolac) inhibitors. Of note, Hynninen *et al.* compared three different NSAIDs with a placebo control group [42]. Morphine was the most common opioid used in the trials (9 out of 15 trials), but also included other opiates, such as fentanyl, tramadol, buprenorphine, codeine, oxycodone, and piritramide.

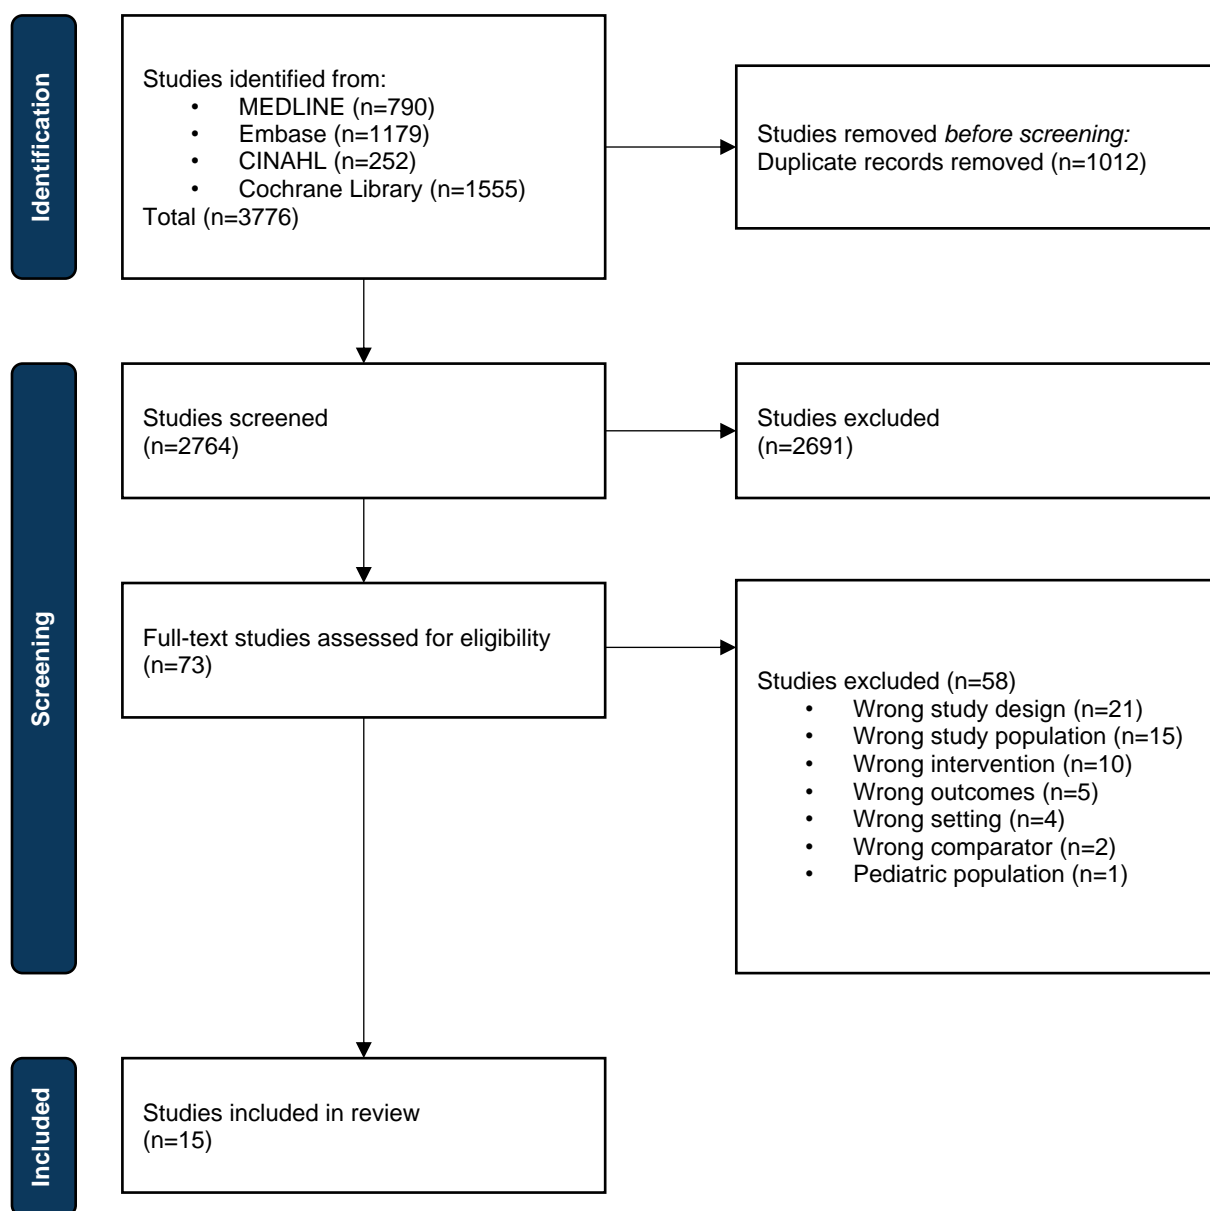

**Fig. 1** Flow chart of study selection. MEDLINE: Medical Literature Analysis and Retrieval System Online, CINAHL: Cumulative Index to Nursing and Allied Health Literature

| Study           | Mean Age                                    | % Female | Sample Size | ICU Admission          | NSAID Adjuvant                       | Opioid                       | Duration Of Intervention                     | Outcomes Analyzed                                                        | Risk Of Bias       |
|-----------------|---------------------------------------------|----------|-------------|------------------------|--------------------------------------|------------------------------|----------------------------------------------|--------------------------------------------------------------------------|--------------------|
| Arslan 2018     | 55.7±9.7                                    | 16%      | 200         | Surgical-CABG          | Diclofenac                           | Fentanyl, Tramadol           | 24h                                          | Ventilation duration, ICU length of stay                                 | Low risk           |
| Aubrun, 2000    | 48.5±14.1                                   | 52%      | 50          | Surgical-Spinal Fusion | Ketoprofen                           | Morphine                     | 24h                                          | Opioid requirements, pain score                                          | Low risk           |
| Bameshki, 2015  | 65.3±11.3                                   | 30%      | 90          | Surgical-Gastrectomy   | Diclofenac                           | Morphine                     | 24h                                          | Opioid requirements                                                      | Low risk           |
| Barilaro, 2001  | 57.1±10.2                                   | 22%      | 60          | Surgical-Cardiac       | Ketorolac                            | Tramadol, Morphine           | 24h                                          | Ventilation duration                                                     | Probably high risk |
| Fayaz, 2004     | 62.7±8.4                                    | 40%      | 54          | Surgical-CABG          | Diclofenac                           | Morphine                     | 24h                                          | Opioid requirements, ventilation duration, post-op bleeding              | High risk          |
| Hynninen, 2000  | 57.9±8.7                                    | 18%      | 114         | Surgical-CABG          | Diclofenac, Ketoprofen, Indomethacin | Morphine, Codeine, Oxycodone | 24h                                          | Opioid requirements, post-op bleeding                                    | Low risk           |
| Imantalab, 2014 | 20.8% (<50)<br>50.8% (50-60)<br>28.3% (>60) | 48%      | 120         | Surgical-CABG          | Diclofenac                           | Morphine                     | 24h                                          | Pain score                                                               | Probably high risk |
| Osojnik, 2020   | 66.6±8.6                                    | 21%      | 72          | Surgical-CABG          | Diclofenac                           | Pirtramide                   | 20h                                          | Ventilation duration, ICU length of stay                                 | Probably low risk  |
| Khalil, 2006    | 57.7±8.0                                    | -        | 40          | Surgical-CABG          | Parexocib                            | Morphine                     | 24h                                          | Ventilation duration, post-op bleeding                                   | Probably high risk |
| Koizuka, 2004   | 63.6±7.4                                    | 23%      | 26          | Surgical-CABG          | Etodolac                             | Buprenorphine                | 24h                                          | Pain score, ventilation duration, post-op bleeding                       | Probably high risk |
| Maddali, 2006   | 56.2±8.6                                    | 28%      | 176         | Surgical-CABG          | Diclofenac                           | Fentanyl                     | Until discharge from post-surgical care unit | Opioid requirements, ventilation duration, ICU length of stay            | High risk          |
| Oberhofer, 2005 | 64.5±10.0                                   | 42%      | 43          | Surgical-Abdomen       | Ketoprofen                           | Fentanyl, Tramadol           | 24h                                          | Opioid requirements                                                      | Probably high risk |
| Ott, 2003       | 60.6±8.1                                    | 13%      | 462         | Surgical-CABG          | Parecoxib, Valdexocib                | Morphine, Codeine            | 14 days                                      | -                                                                        | High risk          |
| Rapanos, 1999   | 60.9±9.5                                    | 21%      | 57          | Surgical-CABG          | Indomethacin                         | Morphine                     | 24h                                          | Opioid requirements, pain scores, ventilation duration, post-op bleeding | Low risk           |
| Yassen, 2012    | 29.2±5.1                                    | 12%      | 57          | Surgical-Hepatectomy   | Ketorolac                            | Fentanyl                     | 48h                                          | Opioid requirements, pain scores, ICU length of stay, post-op bleeding   | Low risk           |

**Table 1** Characteristics of included studies. Data reported as mean ± sd. ICU: intensive care unit, NSAID: non-steroidal anti-inflammatory drugs, CABG: coronary artery bypass graft. Risk of bias: LR: low risk, PLR: probably low risk, PHR: probably high risk, HR: high risk

## Risk of bias assessment

Six out of the 15 trials were deemed to have a low risk of bias [37–39, 42, 48, 49] (Table 1). Five trials had inadequate sequence generation [23, 36, 40, 44, 47], three had inadequate allocation concealment [23, 40, 47], and three trials had concerns with blinding of participants/study personnel [40, 43, 46] (Supplementary Table 3). One trial had incomplete blinding of outcome assessment [47], another did not sufficiently address missing outcome data [41], and another had concerns with selective reporting [45].

## Outcomes

Figure 2 summarizes the findings for each outcome, including the forest plot and GRADE certainty. We have also included the reasoning for rating down evidence in the GRADE analysis in Supplementary Table 4.

Addition of an NSAID as adjunctive analgesia reduced 24-hour oral morphine equivalent (OME) utilization by -21.4 mg (95% CI: -11.8 to -31.0mg reduction, high certainty). It also probably reduced pain measured by the visual analogue scale (VAS) by -6.1 mm (95% CI: -12.2 to +0.1, moderate certainty) at 24 hours. There was probably no impact on mechanical ventilation with the NSAID group (-1.6 hours, 95% CI: -0.4 to -2.7, moderate certainty) and NSAIDs may not have an impact on ICU length of stay (-2.1 hours, 95% CI: -6.1 to +2.0 hours, low certainty). Hospital length of stay was not reported in any of the included trials.

We were unable to complete *a priori* subgroup analyses for ketorolac versus other NSAIDs, younger age versus elderly, and higher versus lower APACHE scores due to insufficient data. Subgroup analysis by risk of bias of individual studies, shown in Supplementary Figure 1, shows no evidence of effect modification by risk of bias.

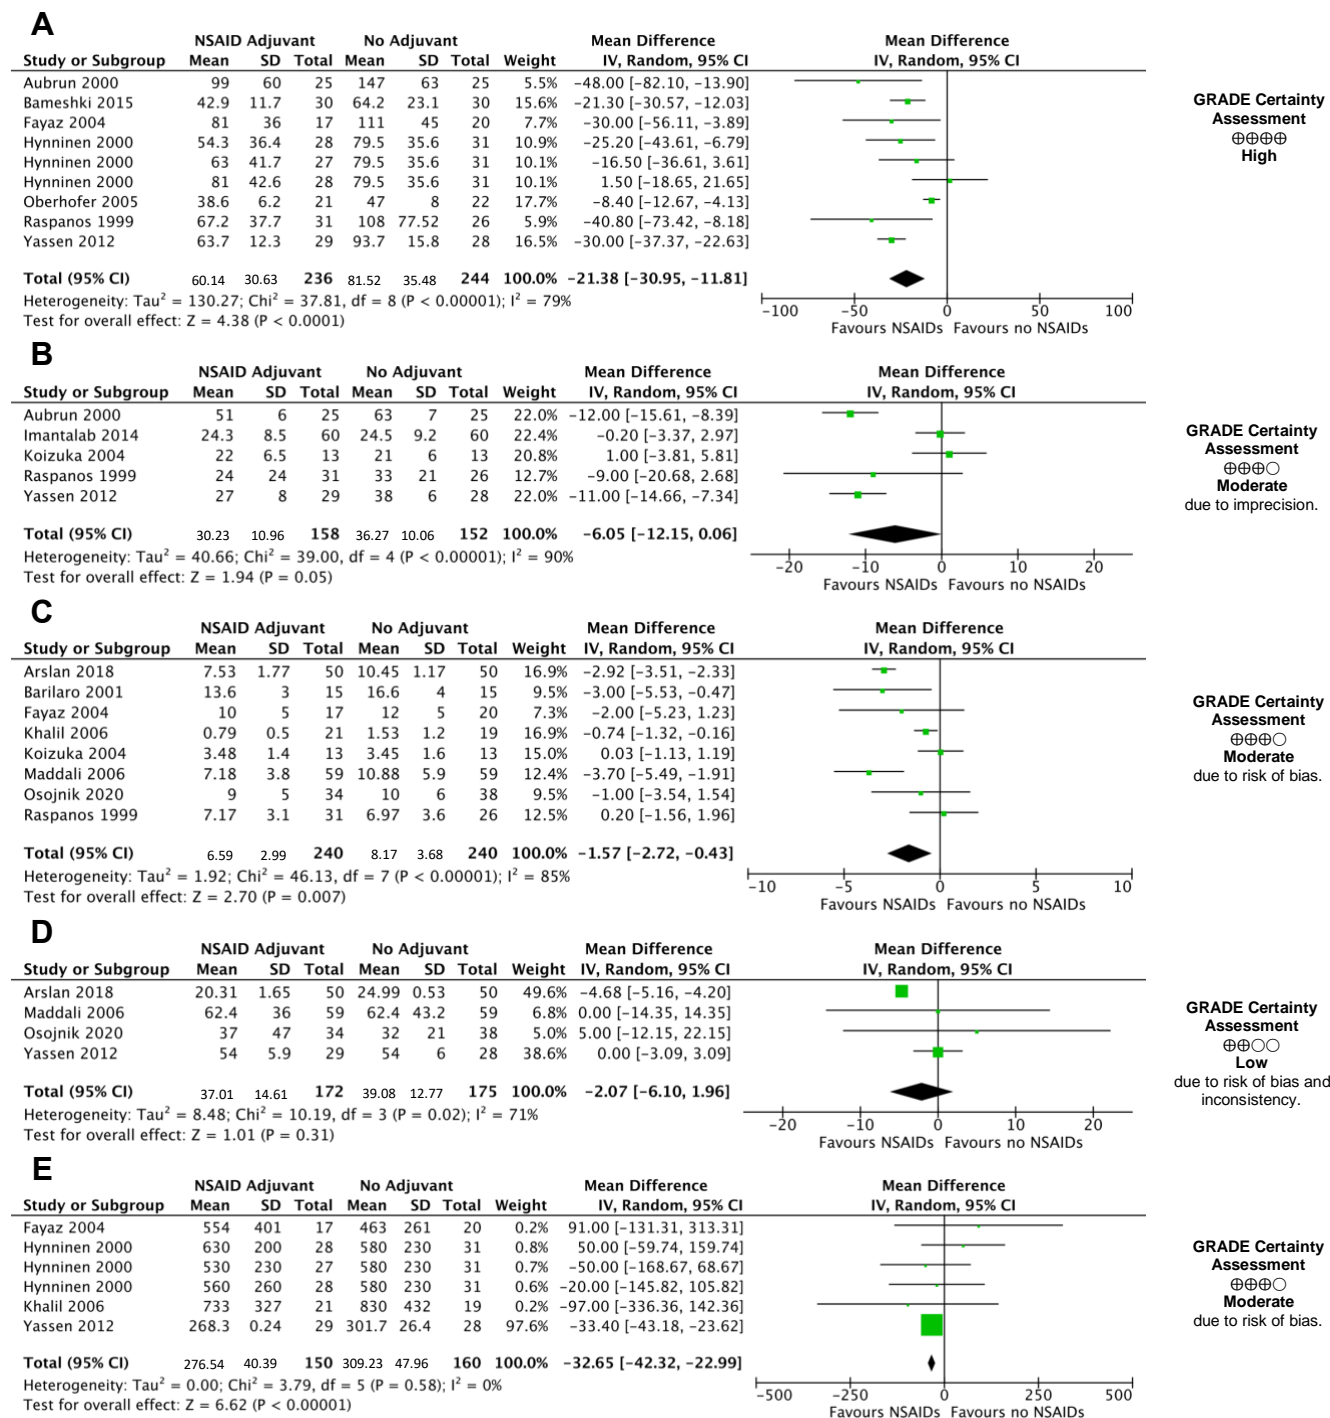

**Fig. 2** Forest plot of **A** opioid consumption in oral morphine equivalents, **B** pain scores in visual analogue scale, **C** duration of mechanical ventilation, **D** intensive care unit length of stay, and **E** bleeding

## Adverse outcomes

For the outcome of bleeding, four trials (n=265) examining blood loss after 24 hours showed that adjunctive use of NSAIDs probably did not meaningfully impact blood loss (-32.7 mL, 95% CI: -23.0 to -42.3 mL, moderate certainty) compared to opioid analgesia alone (Figure 2). Pooled estimates also show that NSAIDs have an uncertain effect on nausea and vomiting (relative risk [RR]: 0.93, 95% CI: 0.68 to 1.28, p=0.66, very low certainty) (Supplementary Figure 4). Furthermore, qualitative assessment of adverse outcomes that were not amenable to pooling did not suggest an increased risk of complications such as gastrointestinal (GI) bleeding (Table 2).

For the outcome of AKI defined per individual study protocol, Oberhofer *et al.* and Rapanos *et al.* described no AKI events in either group [23, 49]. Of the remaining four papers that reported on AKI, two reported no difference in the occurrence of AKI [42, 47] and one did not report statistical significance of difference in oliguria incidence [40]. Khalil *et al.* showed a statistically significant increase in oliguria treated with diuretics for patients allocated to the NSAID group compared with opioid only group [44]. However, none of the patients' AKI progressed to being treated with renal replacement therapy [44]. Delirium was not assessed in any of the included trials.



|                                        | NSAID Adjuvant      | No Adjuvant         | Significance |
|----------------------------------------|---------------------|---------------------|--------------|
| <b>Barilaro, 2001</b>                  | <b><i>n=15</i></b>  | <b><i>n=15</i></b>  |              |
| ST segment elevation >0.1 mm           | 1 (7%)              | 1 (7%)              | N/A          |
| Contraction of diuresis                | 2 (13%)             | 0                   | N/A          |
| <b>Hynninen, 2000</b>                  | <b><i>n=83</i></b>  | <b><i>n=31</i></b>  |              |
| ≥20% increase in creatinine            | 5 (6%)              | 1 (3%)              | NS           |
| <b>Khalil, 2006</b>                    | <b><i>n=21</i></b>  | <b><i>n=19</i></b>  |              |
| Oliguria requiring diuretics           | 16 (76%)            | 9 (47%)             | p=0.04       |
| Hypotension requiring inotrope support | 7 (33%)             | 8 (42%)             | N/A          |
| <b>Ott, 2003</b>                       | <b><i>n=311</i></b> | <b><i>n=151</i></b> |              |
| Myocardial infarct                     | 5 (2%)              | 1 (1%)              | p=0.7        |
| Gastrointestinal bleed                 | 3 (1%)              | 0                   | p=0.6        |
| Constipation                           | 116 (37%)           | 56 (37%)            | p>1          |
| Death                                  | 4 (1%)              | 0                   | p=0.3        |
| Oliguria                               | 15 (10%)            | 45 (15%)            | p=0.2        |

**Table 2** Qualitative description of adverse outcomes N/A: not applicable, no significance was recorded, NS: not significant

## Discussion

This systematic review and meta-analysis demonstrated that adjunctive NSAID analgesia, compared to opioids alone, reduced 24-hour opioid utilization (high certainty evidence) and probably reduced pain scores at 24 hours (moderate certainty evidence). Adjunctive NSAIDs probably did not impact duration of mechanical ventilation (moderate certainty evidence) and may not have impacted ICU length of stay (low certainty evidence). For adverse outcomes, NSAIDs probably has no effect on blood loss 24 hours post-operatively (moderate certainty evidence) and has an uncertain effect on nausea or vomiting (very low certainty evidence). Other adverse outcomes were inconsistently reported, which prevented a pooled analysis, specifically acute kidney injury and gastrointestinal bleeding, two of the most well-known complications of NSAID use. However, a qualitative assessment of the studies suggested minimal differences in renal, GI bleeding, and cardiac dysfunction between the two groups.

The current PADIS 2018 guidelines stated a weak recommendation against using COX NSAIDs as an adjunct to opioid therapy [1]. The PADIS guideline was informed by a pooled analysis of two trials by Hynninen *et al.* and Oberhofer *et al.*, which showed that adjunctive NSAID analgesia reduced 24-hour opioid use by 1.61 mg morphine equivalent (4.8 mg OME) with a non-significant reduction in pain scores at 24 hours [1, 23, 42]. The PADIS guideline concluded that the potential risk of harm superseded the small opioid-sparing effect of NSAIDs. Since then, a meta-analysis of four trials by Wheeler *et al.*, including the study by Hynninen *et al.*, showed that NSAIDs reduced 24-hour opioid use by 11.1 mg OME, more than double what was initially described in the PADIS guideline [17]. Our pooled analysis for opioid reduction involved seven RCTs and demonstrated that the addition of NSAIDs reduced total opioid use by 21.4 mg OME in 24 hours. Opioid utilization may be further reduced when we consider the well-documented synergistic analgesic effects of NSAID in addition to acetaminophen, a commonly used adjunctive analgesic in the critical care setting [1, 50, 51].

Our findings challenge the notion that NSAIDs may have only a small beneficial impact on reducing opioid use, although the clinical significance of the reduction remains unclear. Current evidence suggests that an absolute reduction of 10 mg IV morphine (30 mg OME) or a relative decrease of 40% in non-ICU post-operative patients over 24 hours is clinically significant [52, 53]. However, there is evidence to indicate that any opioid dose over 20 mg OME per day can increase the risk of future overdoses [54, 55]. Reducing opioid use from  $\geq 50$  mg OME daily to  $< 20$  mg can decrease the risk of overdose by half [55]. Gaps in evidence remain regarding clinically significant opioid reduction in critically ill patients, as they typically have higher opioid requirements and higher baseline pain secondary to pain from critical illness, invasive ventilation, and monitoring. In the ICU setting, where continuous infusions (0-2 mg/hr) of intravenous (IV) hydromorphone are commonly used, daily hydromorphone exposure can be up to 48 mg [56]. Our systematic review suggests that the role of NSAIDs in the arsenal of multimodal analgesia may be considered to achieve a clinically significant reduction in opioid use and possibly pain scores.

The perceived adverse events specific to NSAID use, including AKI, gastrointestinal bleeds and cardiovascular events, remain a significant barrier to their widespread use in the ICU. Although these risks have been extensively investigated, their prevalence in the ICU has not been well documented, since historically, NSAIDs have been avoided in critically ill patients [57]. Standard ICU clinical practices, which include close monitoring of creatinine, early fluid resuscitation, and stress ulcer prophylaxis, can reduce, or mitigate adverse outcomes from NSAID use [58, 59]. For example, studies in hospitalized patients with preserved kidney function have found that short-term NSAID use was not associated with an increased risk of AKI [60–62]. Even in cases of NSAID-induced AKI, cessation of the drug and fluid resuscitation usually led to a favourable prognosis and was not associated with progression to receipt of long-term dialysis [63, 64]. In cases of gastrointestinal bleeds, the co-administration of PPIs significantly reduces the risk of both duodenal and gastric ulcers and is recommended across various treatment guidelines [65, 66]. Although prior evidence suggested that NSAID use increased the risk of myocardial infarction

and strokes, more recent evidence has indicated that adverse cardiac events are less than previously thought [12, 57, 67–69]. In essence, short-term NSAID use with consideration of patient risk factors and close monitoring can reduce the risk of adverse events. This paradigm is reflected in recent guidelines, which have suggested that IV ketorolac can be used as an analgesic adjunct in the ICU for up to 5 days [70]. This recommendation was based on level C quality evidence where expert opinion supported the recommendation but acknowledged a paucity of specific evidence.

Our review has several strengths. Firstly, this is the most comprehensive meta-analysis on NSAID use in the ICU to date. The adverse outcome for NSAID use (bleeding) was subjected to a pooled analysis for the first time. Further strengths are its inclusion of strictly randomized control trials, adherence to our pre-registered protocol, and inclusion of studies published in a non-English language.

Our review also has several limitations. The inclusion of only post-operative ICU patients with results limited to the first 24 hours reduces the generalizability of our findings (to the broader non-surgical ICU patient population) and may underestimate the true prevalence of adverse outcomes, particularly when NSAID exposure is prolonged. Our findings are also based on some low-quality trials with high risks of bias which is reflected in our GRADE analysis (Supplementary Table 4). However, the majority of studies are low risk of bias, and our subgroup analyses did not show any effect modification. This limitation was also present in previous systematic reviews, emphasizing the need for further, methodologically rigorous research investigating NSAIDs in ICU patients. While the opioid crisis rages worldwide, there remains a demand for adjunctive analgesics to reduce opioid consumption in the ICU setting, where other researchers are also looking at alternatives (e.g. ketamine, gabapentin, lidocaine, tramadol, etc.) [1, 17, 71–74]. While our meta-analysis indicates that NSAIDs reduce 24-hour opioid consumption, further research is required to characterize the adverse outcomes in a diverse cohort of ICU patients, exposed to NSAIDs for a longer duration. Lower dosage NSAIDs can also be considered to reduce the

prevalence of adverse outcomes [75]. Ketorolac, available in intravenous formulations, has been shown in low doses to be as effective in pain relief compared to higher doses [13, 14, 19–22, 24, 48]. Therefore, further research involving a diverse ICU population, with longer term follow-up monitoring, and varied doses and durations of NSAIDs, is necessary to provide much-needed evidence on the suitability of NSAIDs in the ICU setting.

## **Conclusion**

This systematic review and meta-analysis found that adjunctive NSAIDs to an opioid analgesic regimen reduces 24-hour opioid utilization (high certainty evidence) and probably reduces pain scores at 24 hours (moderate certainty evidence). There was also no increased signal for harm with NSAIDs in duration of mechanical ventilation, ICU length of stay, and adverse.

## References

1. Devlin JW, Skrobik Y, Gélinas C, et al (2018) Clinical Practice Guidelines for the Prevention and Management of Pain, Agitation/Sedation, Delirium, Immobility, and Sleep Disruption in Adult Patients in the ICU. *Crit Care Med* 46:1532–1548. <https://doi.org/10.1097/CCM.0000000000003259>
2. Martyn JAJ, Mao J, Bittner EA (2019) Opioid Tolerance in Critical Illness. *New England Journal of Medicine* 380:365–378. [https://doi.org/10.1056/NEJMRA1800222/SUPPL\\_FILE/NEJMRA1800222\\_DISCLOSURES.PDF](https://doi.org/10.1056/NEJMRA1800222/SUPPL_FILE/NEJMRA1800222_DISCLOSURES.PDF)
3. Yaffe PB, Green RS, Butler MB, Witter T (2017) Is Admission to the Intensive Care Unit Associated With Chronic Opioid Use? A 4-Year Follow-Up of Intensive Care Unit Survivors. *J Intensive Care Med* 32:429–435. <https://doi.org/10.1177/0885066615618189>
4. Mattson CL, Tanz LJ, Quinn K, et al (2021) Trends and Geographic Patterns in Drug and Synthetic Opioid Overdose Deaths — United States, 2013–2019. *MMWR Morb Mortal Wkly Rep* 70:202–207. <https://doi.org/10.15585/MMWR.MM7006A4>
5. Karamchandani K, Pyati S, Bryan W, et al (2019) New Persistent Opioid Use After Postoperative Intensive Care in US Veterans. *JAMA Surg* 154:778–780. <https://doi.org/10.1001/JAMASURG.2019.0899>
6. Pierce M, van Amsterdam J, Kalkman GA, et al (2021) Is Europe facing an opioid crisis like the United States? An analysis of opioid use and related adverse effects in 19 European countries between 2010 and 2018. *Eur Psychiatry* 64:. <https://doi.org/10.1192/J.EURPSY.2021.2219>
7. Pacurucu-Castillo SF, Ordóñez-Mancheno JM, Hernández-Cruz A, Alarcón RD (2019) World Opioid and Substance Use Epidemic: A Latin American Perspective. <https://doi.org/10.1176/appi.prcp.20180009> 1:32–38. <https://doi.org/10.1176/APPI.PRCP.20180009>
8. de Boer HD, Detriche O, Forget P (2017) Opioid-related side effects: Postoperative ileus, urinary retention, nausea and vomiting, and shivering. A review of the literature. *Best Pract Res Clin Anaesthesiol* 31:499–504. <https://doi.org/10.1016/J.BPA.2017.07.002>
9. Duprey MS, Dijkstra-Kersten SMA, Zaal IJ, et al (2021) Opioid Use Increases the Risk of Delirium in Critically Ill Adults Independently of Pain. *Am J Respir Crit Care Med* 204:566–572. <https://doi.org/10.1164/RCCM.202010-3794OC>
10. Davis JS, Lee HY, Kim J, et al (2017) Use of non-steroidal anti-inflammatory drugs in US adults: changes over time and by demographic. *Open Heart* 4:e000550. <https://doi.org/10.1136/OPENHRT-2016-000550>
11. Gupta A, Bah M (2016) NSAIDs in the Treatment of Postoperative Pain. *Curr Pain Headache Rep* 20:. <https://doi.org/10.1007/S11916-016-0591-7>
12. Howard ML, Warhurst RD, Sheehan C (2016) Safety of Continuous Infusion Ketorolac in Postoperative Coronary Artery Bypass Graft Surgery Patients. *Pharmacy* 4:22. <https://doi.org/10.3390/PHARMACY4030022>
13. de Oliveira GS, Agarwal D, Benzon HT (2012) Perioperative single dose ketorolac to prevent postoperative pain: a meta-analysis of randomized trials. *Anesth Analg* 114:424–433. <https://doi.org/10.1213/ANE.0B013E3182334D68>
14. Eidinejad L, Bahreini M, Ahmadi A, et al (2021) Comparison of intravenous ketorolac at three doses for treating renal colic in the emergency department: A noninferiority randomized controlled trial. *Acad Emerg Med* 28:768–775. <https://doi.org/10.1111/ACEM.14202>
15. Vane JR (1971) Inhibition of prostaglandin synthesis as a mechanism of action for aspirin-like drugs. *Nat New Biol* 231:232–235. <https://doi.org/10.1038/NEWBIO231232A0>

16. Oscanoa-Espinoza TJ (2016) Safety of Nonsteroidal Antiinflammatory Drugs. *N Engl J Med* 375:172–179. <https://doi.org/10.1056/NEJME1614257>
17. Wheeler KE, Grilli R, Centofanti JE, et al (2020) Adjuvant Analgesic Use in the Critically Ill: A Systematic Review and Meta-Analysis. *Crit Care Explor* 2:e0157. <https://doi.org/10.1097/CCE.000000000000157>
18. Zhao H, Yang S, Wang H, et al (2019) Non-opioid analgesics as adjuvants to opioid for pain management in adult patients in the ICU: A systematic review and meta-analysis. *J Crit Care* 54:136–144. <https://doi.org/10.1016/J.JCRC.2019.08.022>
19. Sun HL, Wu CC, Lin MS, et al (1992) Combination of low-dose epidural morphine and intramuscular diclofenac sodium in postcesarean analgesia. *Anesth Analg* 75:64–68. <https://doi.org/10.1213/0000539-199207000-00012>
20. de Souza Brito F, Mehta RH, Lopes RD, et al (2017) Nonsteroidal Anti-Inflammatory Drugs and Clinical Outcomes in Patients Undergoing Coronary Artery Bypass Surgery. *Am J Med* 130:462–468. <https://doi.org/10.1016/J.AMJMED.2016.10.023>
21. Qazi SM, Sindby EJ, Nørgaard MA (2015) Ibuprofen - a Safe Analgesic During Cardiac Surgery Recovery? A Randomized Controlled Trial. *J Cardiovasc Thorac Res* 7:141. <https://doi.org/10.15171/JCVTR.2015.31>
22. Reuben SS, Connelly NR, Lurie S, et al (1998) Dose-response of ketorolac as an adjunct to patient-controlled analgesia morphine in patients after spinal fusion surgery. *Anesth Analg* 87:98–102. <https://doi.org/10.1097/0000539-199807000-00021>
23. Oberhofer D, Skok J, Neseck-Adam V (2005) Intravenous ketoprofen in postoperative pain treatment after major abdominal surgery. *World J Surg* 29:446–449. <https://doi.org/10.1007/S00268-004-7612-0/TABLES/4>
24. Motov S, Yasavolian M, Likourezos A, et al (2017) Comparison of Intravenous Ketorolac at Three Single-Dose Regimens for Treating Acute Pain in the Emergency Department: A Randomized Controlled Trial. *Ann Emerg Med* 70:177–184. <https://doi.org/10.1016/J.ANNEMERGMED.2016.10.014>
25. Page MJ, McKenzie JE, Bossuyt PM, et al (2021) The PRISMA 2020 statement: An updated guideline for reporting systematic reviews. *PLoS Med* 18:e1003583. <https://doi.org/10.1371/JOURNAL.PMED.1003583>
26. McGowan J, Sampson M, Salzwedel DM, et al (2016) PRESS Peer Review of Electronic Search Strategies: 2015 Guideline Statement. *J Clin Epidemiol* 75:40–46. <https://doi.org/10.1016/J.JCLINEPI.2016.01.021>
27. Nielsen S, Degenhardt L, Hoban B, Gisev N (2016) A synthesis of oral morphine equivalents (OME) for opioid utilisation studies. *Pharmacoepidemiol Drug Saf* 25:733–737. <https://doi.org/10.1002/PDS.3945>
28. Rohatgi A WebPlotDigitizer. <https://automeris.io/WebPlotDigitizer>. Accessed 18 Oct 2022
29. Tool to Assess Risk of Bias in Randomized Controlled Trials DistillerSR - DistillerSR. <https://www.evidencepartners.com/resources/methodological-resources/tool-to-assess-risk-of-bias-in-randomized-controlled-trials-distillersr>. Accessed 11 Dec 2022
30. Guyatt GH, Oxman AD, Vist GE, et al (2008) GRADE: an emerging consensus on rating quality of evidence and strength of recommendations. *BMJ* 336:924–926. <https://doi.org/10.1136/BMJ.39489.470347.AD>
31. Santesso N, Glenton C, Dahm P, et al (2020) GRADE guidelines 26: informative statements to communicate the findings of systematic reviews of interventions. *J Clin Epidemiol* 119:126–135. <https://doi.org/10.1016/J.JCLINEPI.2019.10.014>
32. DerSimonian R, Laird N (1986) Meta-analysis in clinical trials. *Control Clin Trials* 7:177–188. [https://doi.org/10.1016/0197-2456\(86\)90046-2](https://doi.org/10.1016/0197-2456(86)90046-2)
33. Wan X, Wang W, Liu J, Tong T (2014) Estimating the sample mean and standard deviation from the sample size, median, range and/or interquartile range. *BMC Med Res Methodol* 14:1–13. <https://doi.org/10.1186/1471-2288-14-135/TABLES/3>

34. Guyatt GH, Oxman AD, Kunz R, et al (2011) GRADE guidelines: 7. Rating the quality of evidence - Inconsistency. *J Clin Epidemiol* 64:1294–1302. <https://doi.org/10.1016/j.jclinepi.2011.03.017>
35. Schandelmaier S, Briel M, Varadhan R, et al (2020) Development of the instrument to assess the credibility of effect modification analyses (ICEMAN) in randomized controlled trials and meta-analyses. *CMAJ* 192:E901–E906. <https://doi.org/10.1503/CMAJ.200077/-/DC1>
36. Osojnik I, Kamenik M (2020) The Effect of Diclofenac on Bleeding, Platelet Function, and Consumption of Opioids Following Cardiac Surgery. *Braz J Cardiovasc Surg* 35:160. <https://doi.org/10.21470/1678-9741-2019-0283>
37. Arslan Y, Kudsioğlu T, Yapıcı N, Aykac Z (2018) Administration of Paracetamol, Diclofenac Sodium, And Tramadol in Postoperative Analgesia After Coronary Artery Bypass Surgery. *Journal Of Cardio-Vascular-Thoracic Anaesthesia And Intensive Care Society* 24:23–28. <https://doi.org/10.5222/GKAD.2018.023>
38. Aubrun F, Langeron O, Heitz D, et al (2000) Randomised, placebo-controlled study of the postoperative analgesic effects of ketoprofen after spinal fusion surgery. *Acta Anaesthesiol Scand* 44:934–939. <https://doi.org/10.1034/J.1399-6576.2000.440807.X>
39. Bameshki A, Yazdi AP, Sheybani S, et al (2015) The Assessment of Addition of Either Intravenous Paracetamol or Diclofenac Suppositories to Patient-Controlled Morphine Analgesia for Postgastrectomy Pain Control. *Anesth Pain Med* 5:. <https://doi.org/10.5812/AAPM.29688>
40. Barilaro C, Rossi M, Martinelli L, et al (2001) Control of postoperative pain in heart surgery. Comparison of analgesics. *Minerva Anesthesiol* 67:171–179
41. Fayaz MK, Abel RJ, Pugh SC, et al (2004) Opioid-sparing effects of diclofenac and paracetamol lead to improved outcomes after cardiac surgery. *J Cardiothorac Vasc Anesth* 18:742–747. <https://doi.org/10.1053/j.jvca.2004.08.012>
42. Hynninen MS, Cheng DCH, Hossain I, et al (2000) Non-steroidal anti-inflammatory drugs in treatment of postoperative pain after cardiac surgery. *Canadian Journal of Anesthesia* 2000 47:12 47:1182–1187. <https://doi.org/10.1007/BF03019866>
43. Imantalab V, Mirmansouri A, Sedighinejad A, et al (2014) Comparing the effects of morphine sulfate and diclofenac suppositories on postoperative pain in coronary artery bypass graft patients. *Anesth Pain Med* 4:. <https://doi.org/10.5812/AAPM.19423>
44. Khalil MW, Chatterjee A, MacBryde G, et al (2006) Single dose parecoxib significantly improves ventilatory function in early extubation coronary artery bypass surgery: a prospective randomized double blind placebo controlled trial. *Br J Anaesth* 96:171–178. <https://doi.org/10.1093/BJA/AEI298>
45. Koizuka S, Saito S, Obata H, et al (2004) Oral etodolac, a COX-2 inhibitor, reduces postoperative pain immediately after fast-track cardiac surgery. *J Anesth* 18:9–13. <https://doi.org/10.1007/S00540-003-0215-3>
46. Maddali MM, Kurian E, Fahr J (2006) Extubation time, hemodynamic stability, and postoperative pain control in patients undergoing coronary artery bypass surgery: an evaluation of fentanyl, remifentanyl, and nonsteroidal antiinflammatory drugs with propofol for perioperative and postoperative management. *J Clin Anesth* 18:605–610. <https://doi.org/10.1016/J.JCLINANE.2006.03.022>
47. Ott E, Nussmeier NA, Duke PC, et al (2003) Efficacy and safety of the cyclooxygenase 2 inhibitors parecoxib and valdecoxib in patients undergoing coronary artery bypass surgery. *Journal of Thoracic and Cardiovascular Surgery* 125:1481–1492. [https://doi.org/10.1016/S0022-5223\(03\)00125-9](https://doi.org/10.1016/S0022-5223(03)00125-9)
48. Yassen AM, Gamal &, Sayed E, et al (2019) Low dose ketorolac infusion improves postoperative analgesia combined with patient controlled fentanyl analgesia after living donor hepatectomy – Randomized controlled trial.



- <https://doi.org/10.1016/j.egja.2012.02.010>  
<https://doi.org/10.1016/J.EGJA.2012.02.010>
49. Rapanos T, Murphy P, Szalai JP, et al (1999) Rectal indomethacin reduces postoperative pain and morphine use after cardiac surgery. *Can J Anaesth* 46:725–730.  
<https://doi.org/10.1007/BF03013906>
  50. Miranda HF, Puig MM, Prieto JC, Pinardi G (2006) Synergism between paracetamol and nonsteroidal anti-inflammatory drugs in experimental acute pain. *Pain* 121:22–28.  
<https://doi.org/10.1016/J.PAIN.2005.11.012>
  51. Ong CKS, Seymour RA, Lirk P, Merry AF (2010) Combining paracetamol (acetaminophen) with nonsteroidal antiinflammatory drugs: A qualitative systematic review of analgesic efficacy for acute postoperative pain. *Anesth Analg* 110:1170–1179.  
<https://doi.org/10.1213/ANE.0B013E3181CF9281>
  52. Thybo KH, Hägi-Pedersen D, Dahl JB, et al (2019) Effect of Combination of Paracetamol (Acetaminophen) and Ibuprofen vs Either Alone on Patient-Controlled Morphine Consumption in the First 24 Hours After Total Hip Arthroplasty: The PANSAID Randomized Clinical Trial. *JAMA* 321:562–571.  
<https://doi.org/10.1001/JAMA.2018.22039>
  53. Laigaard J, Pedersen C, Rønsbo TN, et al (2021) Minimal clinically important differences in randomised clinical trials on pain management after total hip and knee arthroplasty: a systematic review. *Br J Anaesth* 126:1029–1037.  
<https://doi.org/10.1016/j.bja.2021.01.021>
  54. von Korff M, Saunders K, Thomas Ray G, et al (2008) De facto long-term opioid therapy for noncancer pain. *Clin J Pain* 24:521–527.  
<https://doi.org/10.1097/AJP.0B013E318169D03B>
  55. Dunn KM, Saunders KW, Rutter CM, et al (2010) Opioid prescriptions for chronic pain and overdose: a cohort study. *Ann Intern Med* 152:85–92. <https://doi.org/10.7326/0003-4819-152-2-201001190-00006>
  56. Barr J, Fraser GL, Puntillo K, et al (2013) Clinical practice guidelines for the management of pain, agitation, and delirium in adult patients in the intensive care unit. *Crit Care Med* 41:263–306. <https://doi.org/10.1097/CCM.0B013E3182783B72>
  57. Lund LC, Reilev M, Hallas J, et al (2020) Association of Nonsteroidal Anti-inflammatory Drug Use and Adverse Outcomes Among Patients Hospitalized With Influenza. *JAMA Netw Open* 3:. <https://doi.org/10.1001/JAMANETWORKOPEN.2020.13880>
  58. Finfer S, Liu B, Taylor C, et al (2010) Resuscitation fluid use in critically ill adults: an international cross-sectional study in 391 intensive care units. *Crit Care* 14:.  
<https://doi.org/10.1186/CC9293>
  59. Stollman N, Metz DC (2005) Pathophysiology and prophylaxis of stress ulcer in intensive care unit patients. *J Crit Care* 20:35–45. <https://doi.org/10.1016/J.JCRC.2004.10.003>
  60. Jeon N, Park H, Segal R, et al (2021) Non-steroidal anti-inflammatory drug-associated acute kidney injury: does short-term NSAID use pose a risk in hospitalized patients? *Eur J Clin Pharmacol* 77:1409–1417. <https://doi.org/10.1007/S00228-021-03121-0>
  61. Hatton GE, Bell C, Wei S, et al (2020) Do early non-steroidal anti-inflammatory drugs for analgesia worsen acute kidney injury in critically ill trauma patients? An inverse probability of treatment weighted analysis. *J Trauma Acute Care Surg* 89:673–678.  
<https://doi.org/10.1097/TA.0000000000002875>
  62. Lee A, Cooper MG, Craig JC, et al (2007) Effects of nonsteroidal anti-inflammatory drugs on postoperative renal function in adults with normal renal function. *Cochrane Database of Systematic Reviews*.  
<https://doi.org/10.1002/14651858.CD002765.PUB3/INFORMATION/EN>

63. Klomjit N, Ungprasert P (2022) Acute kidney injury associated with non-steroidal anti-inflammatory drugs. *Eur J Intern Med* 101:21–28. <https://doi.org/10.1016/J.EJIM.2022.05.003>
64. Wang H, Liu T, Li Q, et al (2022) NSAID Treatment Before and on the Early Onset of Acute Kidney Injury Had an Opposite Effect on the Outcome of Patients With AKI. *Front Pharmacol* 13:1426. <https://doi.org/10.3389/FPHAR.2022.843210/BIBTEX>
65. Rostom A, Wells G, Tugwell P, et al (2000) Prevention of chronic NSAID induced upper gastrointestinal toxicity. *Cochrane Database Syst Rev* 2011:CD002296. <https://doi.org/10.1002/14651858.CD002296>
66. Scheiman JM (2013) The use of proton pump inhibitors in treating and preventing NSAID-induced mucosal damage. *Arthritis Res Ther* 15:S5. <https://doi.org/10.1186/AR4177>
67. Bally M, Dendukuri N, Rich B, et al (2017) Risk of acute myocardial infarction with NSAIDs in real world use: bayesian meta-analysis of individual patient data. *BMJ* 357:1909. <https://doi.org/10.1136/BMJ.J1909>
68. Aminoshariae A, Kulild JC, Donaldson M (2016) Short-term use of nonsteroidal anti-inflammatory drugs and adverse effects: An updated systematic review. *J Am Dent Assoc* 147:98–110. <https://doi.org/10.1016/J.ADAJ.2015.07.020>
69. Chan AT, Manson JAE, Albert CM, et al (2006) Nonsteroidal antiinflammatory drugs, acetaminophen, and the risk of cardiovascular events. *Circulation* 113:1578–1587. <https://doi.org/10.1161/CIRCULATIONAHA.105.595793>
70. Seo Y, Lee HJ, Ha EJ, Ha TS (2022) 2021 KSCCM clinical practice guidelines for pain, agitation, delirium, immobility, and sleep disturbance in the intensive care unit. *Acute and Critical Care* 37:1. <https://doi.org/10.4266/ACC.2022.00094>
71. Pesonen A, Suojaranta-Ylinen R, Hammarn E, et al (2011) Pregabalin has an opioid-sparing effect in elderly patients after cardiac surgery: a randomized placebo-controlled trial. *Br J Anaesth* 106:873–881. <https://doi.org/10.1093/BJA/AER083>
72. Pandey CK, Raza M, Tripathi M, et al (2005) The comparative evaluation of gabapentin and carbamazepine for pain management in Guillain-Barré syndrome patients in the intensive care unit. *Anesth Analg* 101:220–225. <https://doi.org/10.1213/01.ANE.0000152186.89020.36>
73. Guillou N, Tanguy M, Seguin P, et al (2003) The effects of small-dose ketamine on morphine consumption in surgical intensive care unit patients after major abdominal surgery. *Anesth Analg* 97:843–847. <https://doi.org/10.1213/01.ANE.0000075837.67275.36>
74. Insler SR, O'Connor M, Samonte AF, Bazaral MG (1995) Lidocaine and the inhibition of postoperative pain in coronary artery bypass patients. *J Cardiothorac Vasc Anesth* 9:541–546. [https://doi.org/10.1016/S1053-0770\(05\)80138-7](https://doi.org/10.1016/S1053-0770(05)80138-7)
75. Ahmed SA, Al-Lawati H, Jamali F (2019) Dose-dependency of the cardiovascular risks of non-steroidal anti-inflammatory drugs. *Inflammopharmacology* 27:903–910. <https://doi.org/10.1007/S10787-019-00621-5>
